# Supplementary material for: India's biomethane generation potential from wastes and the corresponding greenhouse gas emissions abatement possibilities under three end use scenarios: electricity generation, cooking, and road transport applications
Source: Royal Society of Chemistry journal article supplement (doi:10.1039/d2se01028c), 2022-11-08
Supplement: d2se01028c1.xlsx [file d2se01028c1.xlsx]

## Sheet: Sheet 1
	Biomethane in million m3
State	Agriculture and Horticulture						Animal wastes		Municipal wastes
	Cereals	Horticulture	Cash crops	Oil crops (including POME)	Pulses	Orchards	Animal excrement	Slaughterhouse wastes and wastewaters	Municipal solid wastes (MSW)	Municipal Wastewater (sewage)
Andhra Pradesh	1346.7	175.65	427.84	203.07	30.16	208.34	2508.25	64.94	197.06	75.79
Arunachal Pradesh	0	2.7	0.24	0	0	8.85	129.72	2.39	8.38	1.32
Assam	441.56	79.75	95.49	11.94	2.73	16.58	2070.04	7.69	51.27	18.56
Bihar	1963.94	101.19	386.37	7.59	22.23	64.6	4517.65	57.31	79.47	49.6
Chhattisgarh	640.75	39.58	0	0	45.81	45.29	1848.49	5.08	55.99	25.11
Goa		0	0	0.26	0	0	21.76	0.86	7.77	3.83
Gujarat	480.2	263.71	1015.38	238.26	69.49	97.85	4079.47	2.46	392.4	108.74
Haryana	2235.72	55.96	552.13	91.07	0	8.42	1345.02	30.98	157.15	37.3
Himachal Pradesh	74.05	10.01	0.09	0	0	57.44	573.2	0.39	9.48	2.9
J & K	0	7.92	0	0	0	80.07	627.23	7.47	37.51	14.44
Jharkhand	0	39.82	0	11.08	72.61	27	2207.36	7.8	106.25	33.53
Karnataka	1466.31	221.94	1220.54	71.41	147.41	131.44	2622.77	20.14	507.08	99.71
Kerala	0	208.89	17.32	2.3	0	60.17	468.03	42.55	154.24	67.37
Madhya Pradesh	3545.25	124.17	171.04	486.58	476.99	67.36	5162.29	10.68	222.7	84.85
Maharashtra	829.24	217.53	2565.05	427.47	223.21	242.54	4052.08	72.26	812.2	214.97
Manipur	0	2.95	0	0	0	6.88	72.38	2.91	8.03	3.48
Meghalaya	0	7.4	0.03	0	0	8.54	208.23	5.29	4.26	2.51
Mizoram	0	7.97	0	0.33	0	8.35	36.27	1.17	8.07	2.38
Nagaland	0	15.59	0.1	0	0	5.81	59.04	2.55	7.49	2.43
Odisha	758.5	99.51	1.03	3.92	8.5	129.58	1886.52	18.97	52.24	29.59
Punjab	3779.27	59.48	339.72	14.55	0	15.65	1497.73	21.81	137.3	43.93
Rajasthan	2277.07	12.52	37.38	270.16	153.76	10.02	5319.25	31.02	205.68	72.23
Sikkim	0	4.38	0.01	0	0	3.1	43.67	0.35	2.99	0.63
Tamil Nadu	1840.9	260.11	418.74	46.05	29.24	99.57	2926.61	46.17	510.14	147.81
Telengana	1336.94	36.61	1516.59	63.65	17.93	47.66	1783.22	73.84	368.76	44.11
Tripura	0	13.97	0.72	0	0	10.69	150.9	3.3	18.09	4.07
Uttar Pradesh	7426.34	206.78	3898.77	61.57	120.58	116.74	10284	114.71	537.58	188.07
Uttarakhand	112.84	13.44	136.57	0	0	26.05	551.23	2.8	64.94	13.07
West Bengal	1813.51	374.83	169.89	50.84	27.19	52.66	3709.7	80.63	472.86	123.2
Andaman and Nicobar				0			13.59	0.29	2.48	0.58
Chandigarh				0			5.85	0.13	16.44	4.33
Daman, Diu, D & N Haveli				0			6.9	0	3	1.46
Delhi				0			60.41	0.02	539.29	109.69
Lakshadweep				0			1.11	0.01	1.39	0.21
Puducherry				0			22	0.24	15.85	3.59
Others	3040.54	11.71	376.8	147.86	76.49	19.35
Total (for India)	35409.6	2676.07	13347.8	2209.95	1524.33	1676.6	60871.9	739.21	5775.83	1635.39
